# Supplementary material
Source: PubMed Central journal article supplement (PMC3698636)
Supplement: cr201366x1.pdf [file cr201366x1.pdf]

## Supplementary information, Figure S1

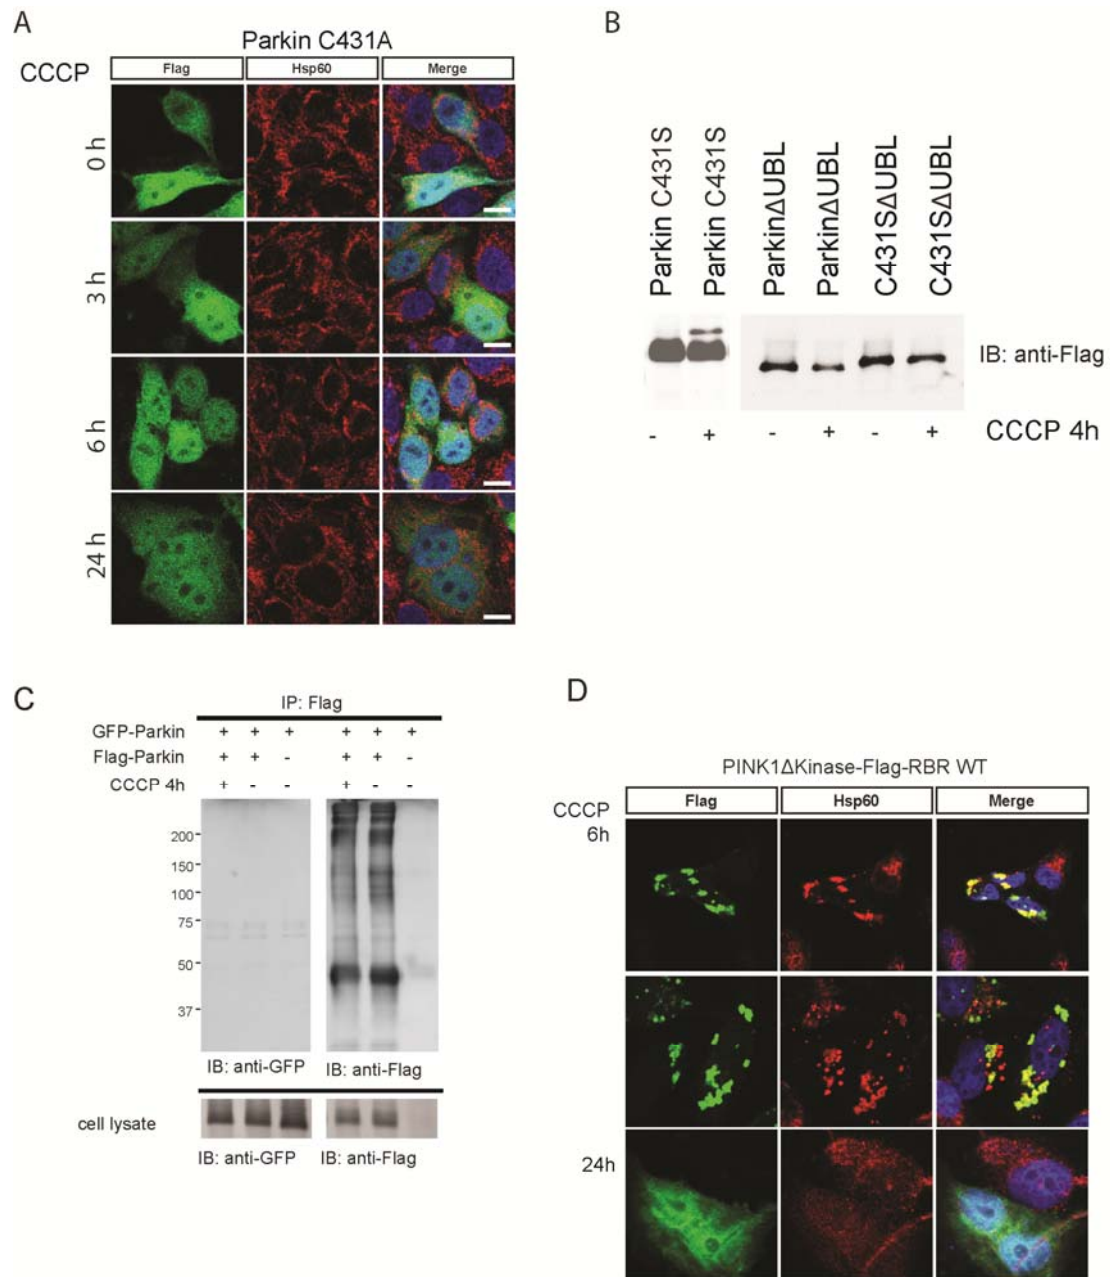

**Figure S1 (A)** Mutation of the putative catalytic cysteine 431 to alanine in the Parkin RBR domain abrogated mitochondrial translocation and clearance. HeLa cells transfected with Flag Parkin C431A were treated with CCCP. The cells were stained with anti-Flag antibody (green), anti-Hsp60 antibody (red) and Hoechst 33342 (blue). Scale bars, 10  $\mu$ m. **(B)** Deletion of the UBL domain cannot lead to ubiquitin trapped

Parkin in treated or untreated with CCCP. **(C)** Failure to detect GFP-Parkin/Flag-Parkin co-immunoprecipitation. **(D)** PINK1 $\Delta$ Kinase-Flag-RBR WT can trigger mitochondrial aggregation and mitophagy when treated with CCCP. The cells were stained with anti-Flag antibody (green), anti-Hsp60 antibody (red) and Hoechst 33342 (blue).
